# Supplementary material for: Rationally Designed Influenza Virus Vaccines That Are Antigenically Stable during Growth in Eggs
Source: PubMed Central journal article supplement (PMC5461409; doi:10.1128/mbio.00669-17), 2017-06-06
Supplement: mbo003173328sf1.pdf [file mbo003173328sf1.pdf]

## Supplementary Figure 1

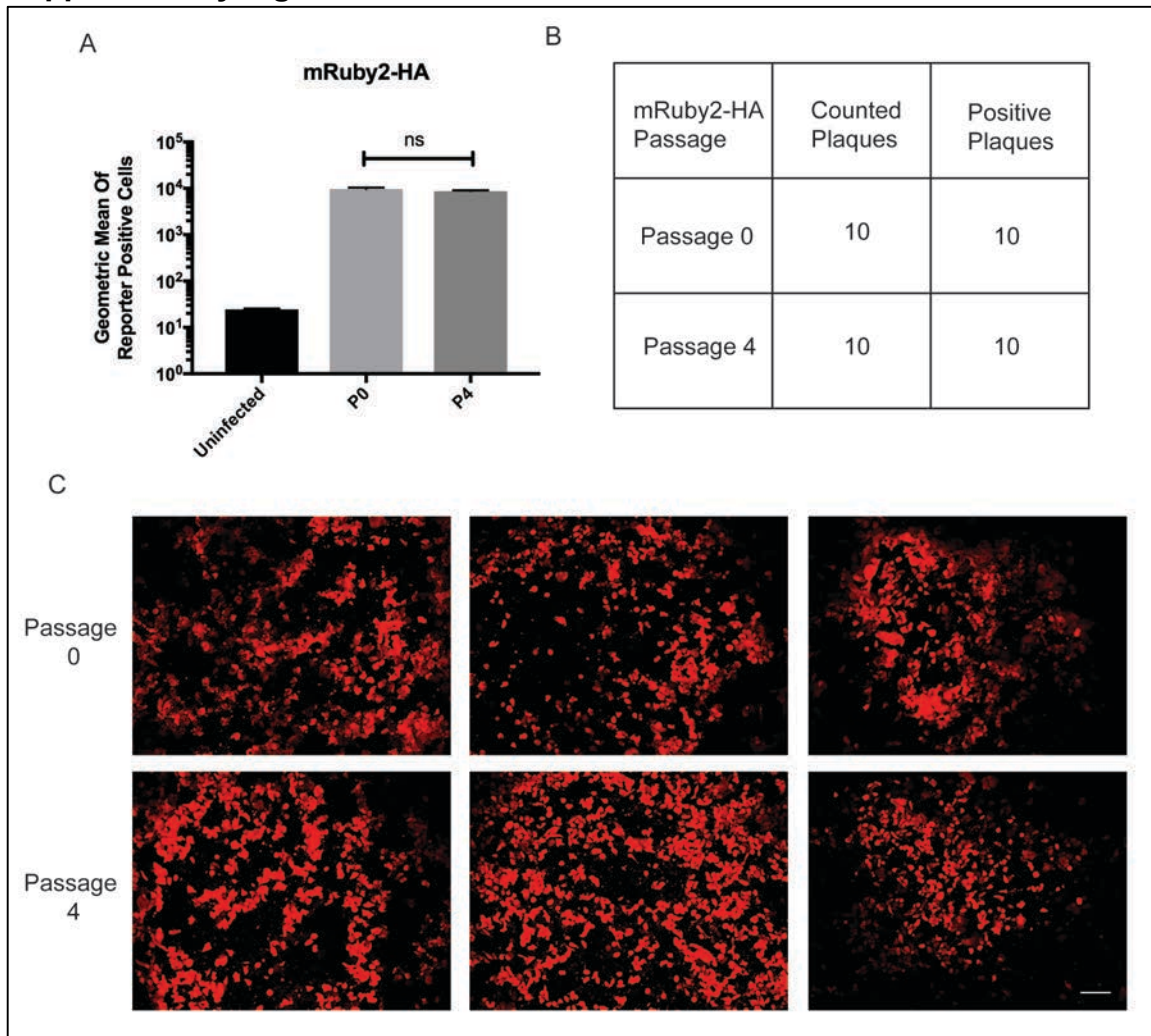

**The mRuby2-HA virus stably expresses the reporter protein over serial passaging. (A)** Quantification of the brightness of passage 0 and passage 4 mRuby2-HA infected cells via flow cytometry. **(B)** A table comparing the number of reporter positive plaques out of total plaques between passage 0 and passage 4 of the mRuby2-HA virus. Identified plaques were confirmed via staining for flu proteins as described in Methods & Materials. **(C)** Representative images of the plaques that were counted, demonstrating similar brightness and morphology between passages.
