# Supplementary material for: Rationally Designed Influenza Virus Vaccines That Are Antigenically Stable during Growth in Eggs
Source: PubMed Central journal article supplement (PMC5461409; doi:10.1128/mbio.00669-17), 2017-06-06
Supplement: mbo003173328sf2.pdf [file mbo003173328sf2.pdf]

## Supplementary Figure 2

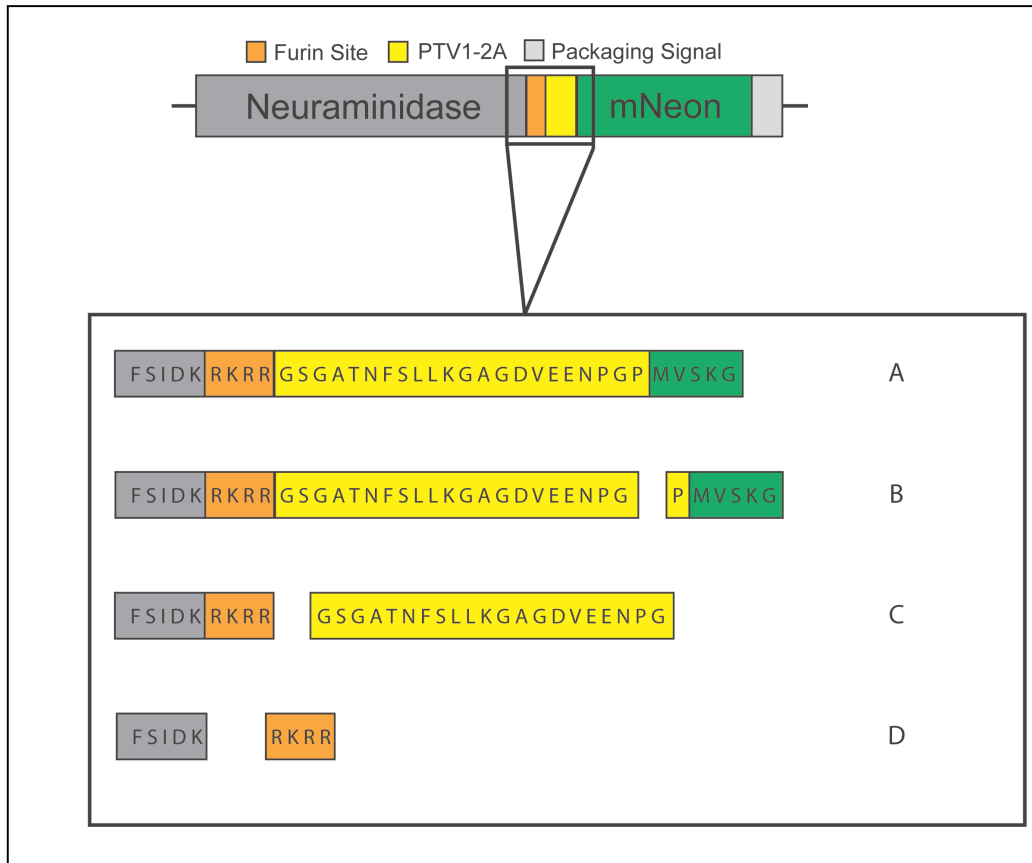

**Schematic of the Neuraminidase-Furin-mNeon construct, and its processing.** (A) A depiction of the amino acids encoded by the construct, amino acids are color coded to match the specific portions of the construct they come from. (B) A depiction of the inability of ribosomes to form a peptide bond between the final Glycine and Proline of the PTV1-2A sequence, causing the Neuraminidase and mNeon proteins to separate. (C) A depiction of Furin protease recognizing the cleavage RKRR motif and cleaving the remaining PTV1-2A amino acids from Neuraminidase. (D) A depiction of Carboxypeptidase B enzymes cleaving the basic amino acids of the furin cleavage site from the N-terminus of Neuraminidase, leaving wild-type protein.
