# Supplementary material for: Rationally Designed Influenza Virus Vaccines That Are Antigenically Stable during Growth in Eggs
Source: PubMed Central journal article supplement (PMC5461409; doi:10.1128/mbio.00669-17), 2017-06-06
Supplement: mbo003173328sf3.pdf [file mbo003173328sf3.pdf]

### Supplementary Figure 3

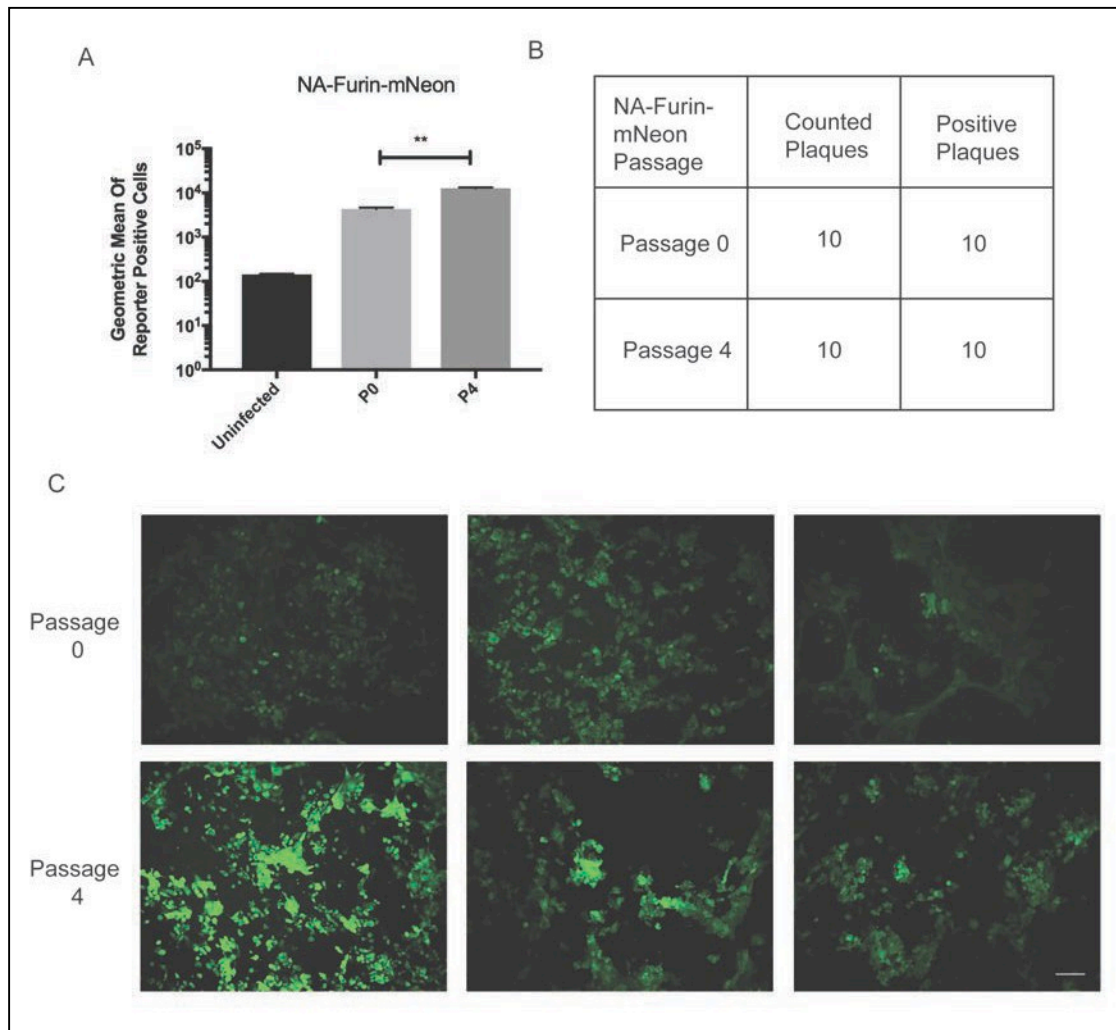

**The NA-Furin-mNeon virus stably expresses the reporter protein over serial passaging.** (A) Quantification of the brightness of passage 0 and passage 4 NA-Furin-mNeon infected cells via flow cytometry. (B) A table comparing the number of reporter positive plaques out of total plaques between passage 0 and passage 4 of the NA-Furin-mNeon virus. Identified plaques were confirmed via staining for flu proteins as described in Methods & Materials. (C) Representative images of the plaques that were counted, demonstrating similar brightness and morphology between passage
