# Supplementary material for: Rationally Designed Influenza Virus Vaccines That Are Antigenically Stable during Growth in Eggs
Source: PubMed Central journal article supplement (PMC5461409; doi:10.1128/mbio.00669-17), 2017-06-06
Supplement: mbo003173328sf4.pdf [file mbo003173328sf4.pdf]

## Supplementary Figure 4

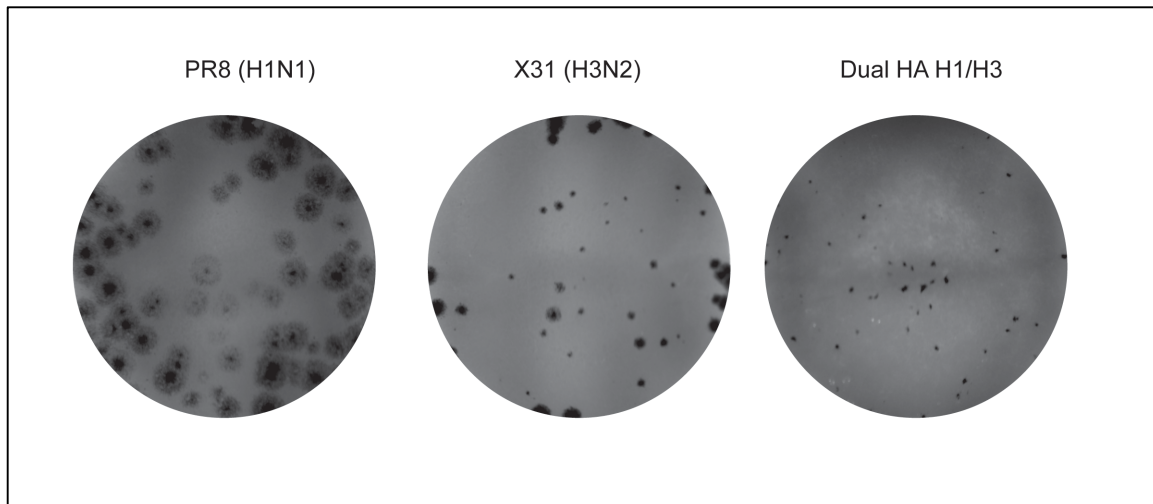

**Plaque morphology of the parental PR8 (H1N1), X31 (H3N2) viruses as compared to the Dual HA H1/H3 virus in a plaque assay on MDCK cells.**
