# Supplementary material for: Rationally Designed Influenza Virus Vaccines That Are Antigenically Stable during Growth in Eggs
Source: PubMed Central journal article supplement (PMC5461409; doi:10.1128/mbio.00669-17), 2017-06-06
Supplement: mbo003173328sf6.pdf [file mbo003173328sf6.pdf]

## Supplementary Figure 6

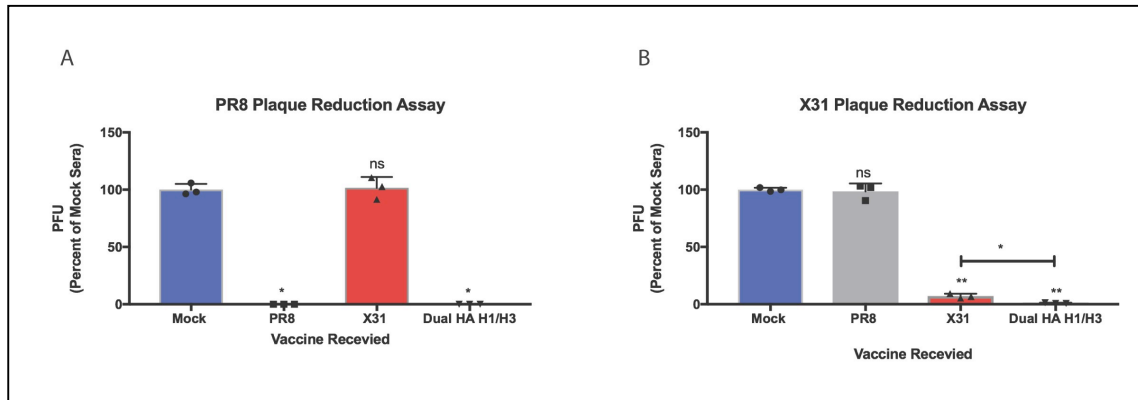

**Plaque Reduction Assays performed with sera from vaccinated mice.**

Plaque reduction assays were repeated at a dilution 2x higher (1:50) than that reported in Figure 5F & G against the PR8 (H1N1) virus (**A**) and X31 (H3N2) virus (**B**).
