# Supplementary material for: Rationally Designed Influenza Virus Vaccines That Are Antigenically Stable during Growth in Eggs
Source: PubMed Central journal article supplement (PMC5461409; doi:10.1128/mbio.00669-17), 2017-06-06
Supplement: mbo003173328sf7.pdf [file mbo003173328sf7.pdf]

## Supplemental Figure 7

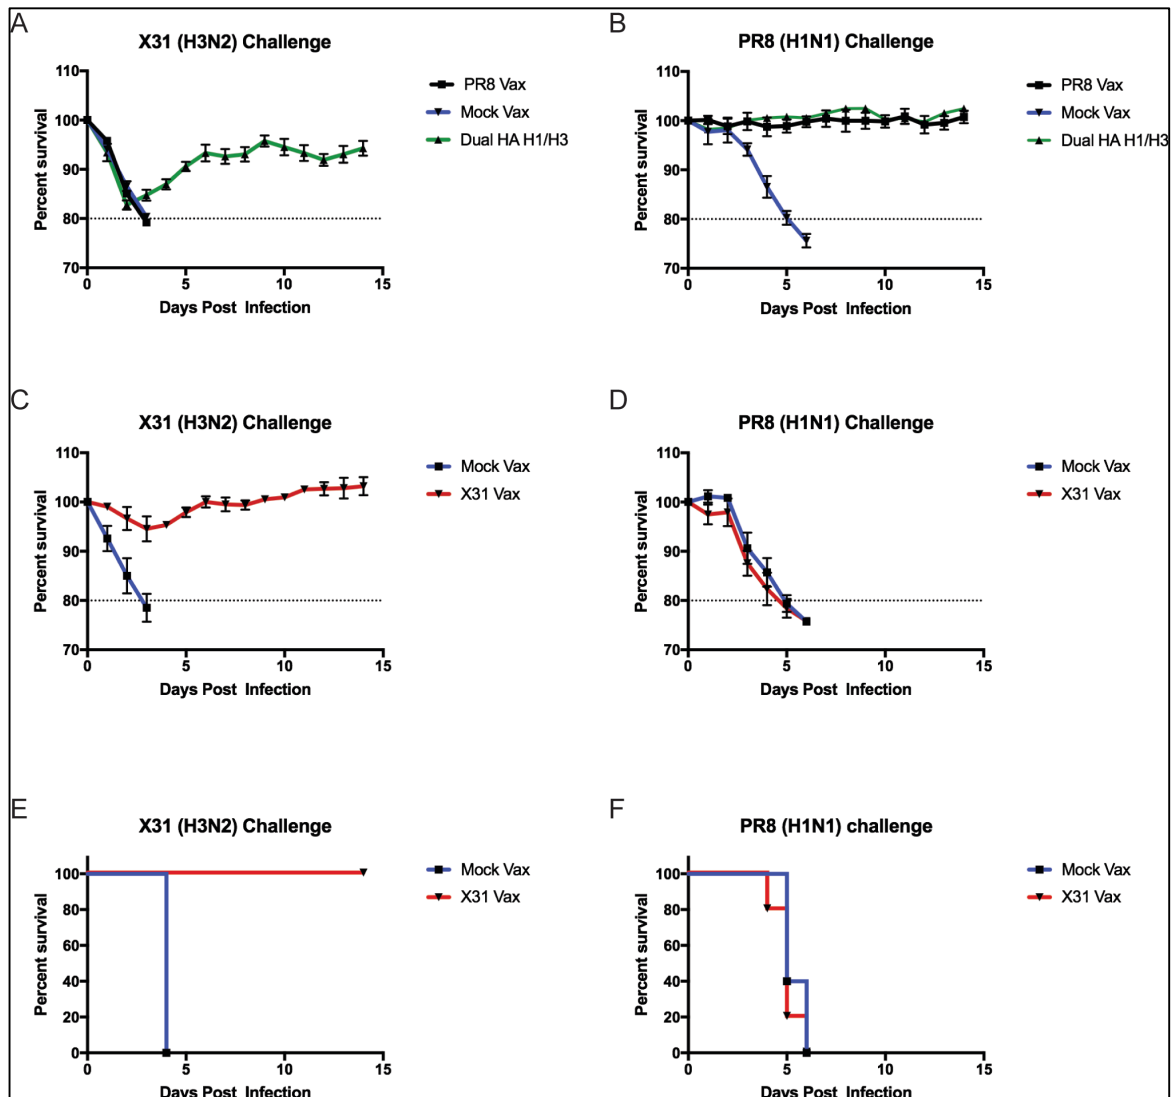

### Weight-loss and survival curves from X31 and PR8 challenges of vaccinated mice.

Mice were vaccinated with 7 $\mu$ g of protein from concentrated samples of either inactivated PR8 WT, X31 or Dual HA H1/H3 virus. After 2 weeks mice were boosted and then challenged with the H3N2 strain X31 (**A, C, & E**) or the H1N1 strain PR8 (**B, D, & F**). Each cage of mice ( $n \geq 4$ ) was weighed daily for 14 days and the average percent weight-loss was recorded.
