# Supplementary material for: Rationally Designed Influenza Virus Vaccines That Are Antigenically Stable during Growth in Eggs
Source: PubMed Central journal article supplement (PMC5461409; doi:10.1128/mbio.00669-17), 2017-06-06
Supplement: mbo003173328sf8.pdf [file mbo003173328sf8.pdf]

## Supplementary Figure 8

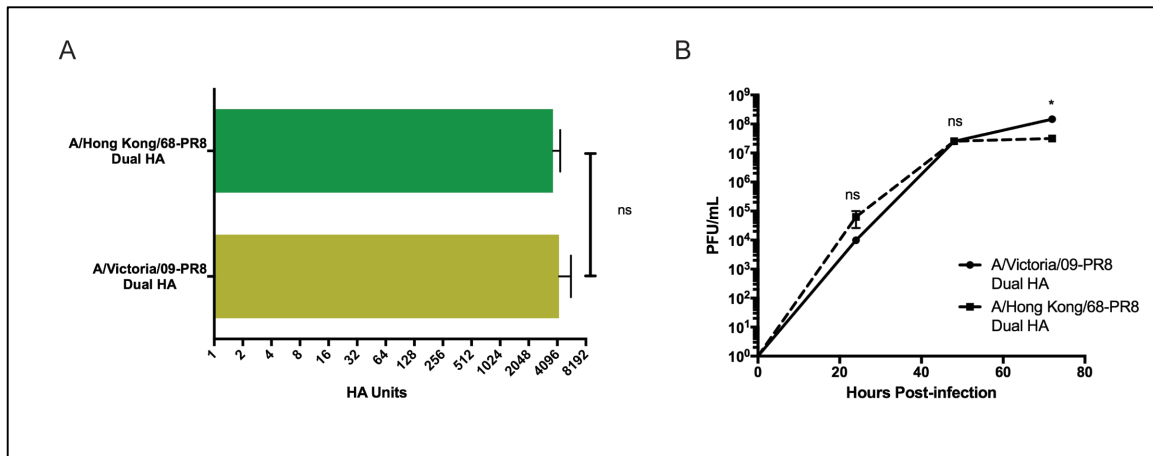

**Dual HA viruses using modern H3 HA exhibit similar growth kinetics and HA content to egg-adapted dual HA viruses. (A)** HA assay of A/Victoria/210/09 expressing dual HA virus as compared to A/Hong Kong/1968 dual HA. **(B)** Growth kinetics in 11-day-old eggs of A/Victoria/210/2009 expressing dual HA virus as compared to the A/Hong Kong/1968 dual HA virus.
